# Supplementary material for: Comparative Chemical Profiling and Biological Potential of Essential Oils of Petal, Choke, and Heart Parts of Cynara scolymus L. Head
Source: Hindawi journal article supplement (doi:10.1155/2022/2355004), 2022-05-27
Supplement: f1 [file 2355004.f1.docx]

**Supplementary Information**

**Comparative chemical profiling and biological potential of essential oils of a petal, choke and heart parts of *Cynara scolymus* L. head**

Sana Razhan M. Alsubaiei1, Hanan A. Alfawaz*1, Musarat Amina*2, Nawal M. Al Musayeib2, Afaf El-Ansary3, Syed Rizwan Ahamad4, Omar M. Noman5, Jaber A. Maini6

1Department of Food Science and Nutrition, College of Food & Agriculture Sciences, King Saud University, P.O. Box 22452, Riyadh 11495, Saudi Arabia

2Department of Pharmacognosy, Pharmacy College, King Saud University, Riyadh 11451, Saudi Arabia.

3Central Laboratory, Female Center for Medical Studies and Scientific Section, King Saud University, P O Box 22452, Riyadh 11451, Saudi Arabia.

4Central Laboratory, Department of Pharmaceutical Chemistry, College of Pharmacy, King Saud University, Riyadh, Saudi Arabia

5Medicinal, Aromatic and Poisonous Plants Research Center, College of Pharmacy, King Saud University, Riyadh, 11451, Saudi Arabia

6Radiochemistry lab, Nuclear Science Research Institute, King Abdulaziz City for Science and Technology, P O Box 6086, Riyadh 11442, Saudi Arabia*.*

***Correspondence should be addressed to** Musarat Amina [mamina@ksu.edu.sa](mailto:mamina@ksu.edu.sa)

Hanan A. Alfawaz halfawaz@ksu.edu.sa

Table S1: Instrumental setting (ELAN-9000, Perkin Elmer) for the ICP-MS based elemental analysis of *C. scolymus* L extract

| **ELAN-9000, Perkin Elmer**  **Parameters for the analysis of vegetable part extract**  **(petal, choke and heart) of *C. scolymus*** |
| --- |
| RF Power: 1500 watts  Plasma Gas Flow: 15 L/min  Auxiliary Gas Flow:1 L/min  Nebulizer Gas Flow: 0.83-0.88 L/min  Peristaltic Pump Speed: 0.5 mL/min  Nebulizer/Spray Chamber PFA-ST/Peltier-cooled cyclonic  Spray Chamber Temp: 2 ᴼC  Detector Mode Dual Lens/ AutoLens Enabled  Sampler/Skimmer Cones Nickel  Scanning Mode: Peak Hopping  Number of Points/Peak: 1  Number of Sweeps/Reading: 10  Number of Readings/Replicate: 1  Number of Replicates: 3 |
